# 1 **Study of pre-synaptic internalisation in human schizophrenia** 2 **brains**

## 3 4 **Authors**

5 Makis Tzioras<sup>1,2</sup>, Anna J. Stevenson<sup>1,2</sup>, Delphine Boche<sup>3\*</sup>, Tara L. Spires-Jones<sup>1,2\*</sup>

## 6 7 **Affiliations**

8 <sup>1</sup> UK Dementia Research Institute, The University of Edinburgh, UK

9 <sup>2</sup> Centre for Brain Discovery Sciences, The University of Edinburgh, UK

10 <sup>3</sup> Clinical Neurosciences, Clinical and Experimental Sciences Academic Unit, Faculty of  
11 Medicine, University of Southampton, UK

12

## 13 **\* Equal contribution**

## 14 **Correspondence to:**

15 Professor Tara L. Spires-Jones  
16 1 George Square, EH8 9JZ, Edinburgh, UK  
17 Email: [Tara.Spires-Jones@ed.ac.uk](mailto:Tara.Spires-Jones@ed.ac.uk)  
18 Tel: 0131 6511895

19

20

## 21 **Abstract**

### 22 **Aims**

23 Efficient synaptic communication is crucial to maintain healthy behavioural and cognitive  
24 processes. Individuals affected by schizophrenia present behavioural symptoms and  
25 alterations in decision-making, suggesting altered synaptic integrity as the support of the  
26 illness. It is currently unknown how this synaptic change is mediated in schizophrenia, but  
27 microglia have been proposed to act as the culprit, actively removing synapses  
28 pathologically. Here, we aimed to explore the interaction between microglia and synaptic  
29 uptake in human post-mortem tissue.

30

31

32

33

## 34 **Methods**

35 We assessed microglial activation and synaptic internalisation by microglia in a post-mortem  
36 human tissue of 10 control and 10 schizophrenia cases. Immunohistochemistry was  
37 performed to identify microglia (Iba1 and CD68) and the presynaptic terminals (synapsin I).

38

## 39 **Results**

40 We found no difference in microglial expression, nor a difference in pre-synaptic protein  
41 level phagocytosed by microglia between the two groups.

42

## 43 **Conclusions**

44 Our findings are consistent with the brain imaging studies in schizophrenia implying that  
45 microglia play a role mainly during the early phases of the disease, by example in active  
46 synapse remodelling, which is not detected in the chronic stage of the illness.

47

48

49 **Keywords: synapse; gliosis; phagocytosis; psychiatric disorder; post-mortem;**  
50 **immunohistochemistry**

51

52 **Abstract word count: 178**

53 **Manuscript word count: 2,793**

54

55 **Number of Figures: 2**

56 **Number of Tables: 1**

57

58

59

60

61

62

63

64

65

66

67

68

## 69 **Introduction**

70

71 Efficient synaptic communication is crucial to maintain healthy behavioural and cognitive  
72 processes. In neurodevelopmental diseases, like schizophrenia, affected individuals can  
73 exhibit behavioural symptoms like psychosis, hallucinations and alterations in decision-  
74 making. A reduction in cortical grey matter volume and enlarged ventricles in the brains of  
75 schizophrenia cases has been consistently reported [1,2]. This reduction in cortical volume is  
76 likely to be an outcome of neuronal and synaptic loss, which has also been reported in  
77 schizophrenia but the results have varied between brain area and synaptic markers examined  
78 [3–7]. A meta-analysis of the expression of synaptic markers in the disease has shown  
79 reduced levels of pre-synaptic markers, including synaptophysin and synapsin, in the  
80 hippocampus and frontal cortex which are heavily implicated in schizophrenia, but not in  
81 unaffected areas like the temporal and occipital lobes [8]. Synapses are crucial mediators of  
82 brain communication [9–11], and so, such synaptic alterations can have an impact on brain  
83 network connectivity, a process known to be affected in schizophrenia [12]. There are several  
84 factors during brain development that influence brain connectivity, with non-neuronal  
85 contributors playing an important role in synaptic formation and network maturation [13,14].  
86 One of these non-neuronal contributors are microglia, the resident brain immune cells and  
87 primary phagocytes of the brain [14–17], which have been shown to facilitate neural network  
88 shaping in development by phagocytosing synapses using the complement system [18–20].  
89 However, microglia can be aberrantly involved in synaptic elimination in non-physiological  
90 contexts, like observed in animal models of Alzheimer’s disease [21,22]. In schizophrenia,  
91 few experimental studies have explored the role of microglia in synaptic loss with evidence  
92 to suggest their involvement in excessive synaptic pruning [23]. Whether this is true in the  
93 human brain in schizophrenia is unknown. Here, we perform a human post-mortem study to  
94 investigate the role of microglia in synaptic engulfment in schizophrenia.

95

96

97

98

99

100

101

## 102 **Methods**

103

### 104 **Human tissue**

105 Ten cases with a confirmed diagnosis of schizophrenia and 10 non-neurological and non-  
 106 neuropathological controls were obtained from the Corsellis Collection (Table 1). Dorsal  
 107 prefrontal cortex, an area showing neuroimaging abnormalities with reduction of the grey  
 108 matter volume in chronic schizophrenia [1], was investigated for all cases. Cases with any  
 109 other significant brain pathologies such as infarct, tumour, or traumatic brain injury were  
 110 excluded from the study. Controls with no history of neurological or psychiatric disease or  
 111 symptoms of cognitive impairment were matched to cases as possible. No difference in age at  
 112 death and in post-mortem delay was detected between the 2 groups. To minimize the time in  
 113 formalin, which has an effect on the quality of the immunostaining, the selection was  
 114 performed on the availability of formalin-fixed paraffin embedded tissue, and thus on blocks  
 115 processed at the time of the original post-mortem examination. Characteristics of the cohorts  
 116 are provided in Table 1.

117

118 **Table 1:** Demographic, clinical and *post-mortem* characteristics of control and schizophrenia  
 119 cases

120

| <b>Cases</b>                                  | <b>Ctrl (n=10)</b> | <b>Sz (n=10)</b>  | <b>P value</b> |
|-----------------------------------------------|--------------------|-------------------|----------------|
| Sex                                           | 4F:6M              | 2F:8M             |                |
| Age at death (years, mean $\pm$ SD)           | 64.40 $\pm$ 19.78  | 64.80 $\pm$ 20.37 | P = 0.94       |
| Post-mortem delay (hours, mean $\pm$ SD)      | 61.90 $\pm$ 51.23  | 50.60 $\pm$ 24.52 | P = 0.61       |
| Age of onset (years, mean $\pm$ SD)           | NA                 | 36.50 $\pm$ 13.81 |                |
| Duration of illness<br>(years, mean $\pm$ SD) | NA                 | 35.13 $\pm$ 21.85 |                |
| Cause of death                                |                    |                   |                |
| <i>Cardiovascular disease</i>                 | 8                  | 5                 |                |
| <i>infection/inflammation</i>                 | 1                  | 3                 |                |
| <i>Trauma</i>                                 | 1                  | 1                 |                |
| <i>Others*</i>                                | 0                  | 1                 |                |

121 *Ctrl*, neurologically/cognitively normal controls; *Sz*, Schizophrenia cases; *F*, female, *M*, male; *SD*, standard  
 122 deviation; *NA*, Not Applicable; \*foreign body in respiratory tract

123

## 124 **Immunohistochemistry**

125 Paraffin-embedded tissue was cut at 7 $\mu$ m thickness on a microtome and mounted on  
126 Superfrost glass slides. The tissue was dewaxed in xylene, followed by rehydration in 100%  
127 EtOH, 90% EtOH, 70% EtOH, 50% EtOH, and finally water for 3 minutes each. Citric acid  
128 pH6 (VectorLabs, H-3300) was used for heat-mediated antigen retrieval by pressure cooking  
129 for 3 minutes at the steam setting. The slides were incubated for 5 minutes with  
130 autofluorescence eliminator reagent (Merck Millipore, 2160) to reduce background, followed  
131 by another 5 minutes incubation with Vector TrueView autofluorescence quenching kit  
132 (VectorLabs, SP-8400) to reduce red blood cell autofluorescence. Sections were blocked in  
133 10% normal donkey serum (Sigma Aldrich, D9663-10ML) and 0.3% Triton X-100 (T8787-  
134 100ML) for 1 hour at room temperature. Microglia were stained with Iba1 (Abcam, ab5079,  
135 goat polyclonal, 1:500), and CD68 (DAKO, M0876, mouse monoclonal, 1:100), and pre-  
136 synaptic terminals with synapsin I (Sigma Aldrich, AB1543P, rabbit polyclonal, 1:750),  
137 overnight at 4°C in a humid chamber. All primary antibodies were diluted in the blocking  
138 solution described above. The following cross-adsorbed secondary antibodies were used:  
139 donkey anti-goat A647 (Thermo Fisher Scientific, A32849), donkey anti-mouse A594  
140 (Thermo Fisher Scientific, A32744), and donkey anti-rabbit A488 (Thermo Fisher Scientific,  
141 A32790). All secondary antibodies were diluted in phosphate buffer saline (PBS) (Thermo  
142 Fisher Scientific, 70011036). For tissue washes, 10X PBS was diluted in water to 1X  
143 concentration, with the addition of 0.3% Triton X-100 in washes prior to primary antibody  
144 incubation. Nuclei were counterstained with DAPI (1 $\mu$ g/ml) (D9542-10MG, Sigma-Aldrich).

145

## 146 **Confocal microscopy and image analysis**

147 Twenty images were taken randomly throughout all cortical layers of the grey matter for each  
148 case using a Leica TCS8 confocal microscope with a 63x oil immersion objective.  
149 Acquisition parameters were kept constant for all images and cases. Lif files were split into  
150 tiff files, and batch analysed on ImageJ (version 1.52p, Wayne Rasband, NIH, USA) using a  
151 custom co-localisation and thresholding macro. Images from different cases were also  
152 manually analysed to ensure the macro was accurately detecting positive signal and  
153 excluding background. For synaptic internalisation by microglia we chose to analyse the  
154 colocalization of CD68 with Syn1, and also normalised to either CD68 or Iba1 burden. Data  
155 are expressed as protein burden (%) defined as the area fraction of each image labelled by the

156 antibody. 3D reconstruction images were generated in ParaView 5.8.0. All experiments and  
157 analyses were blinded to the experimenter.

158

159

160

161

## 162 **Ethics**

163 Ethical approval was provided by BRAIN UK, a virtual brain bank which encompasses the  
164 archives of neuropathology departments in the UK and the Corsellis Collection, ethics  
165 reference 14/SC/0098. The study was registered under the Ethics and Research Governance  
166 (ERGO) of the Southampton University (Reference 19791).

167

## 168 **Statistics**

169 R Studio version 3.6.0 (2019-04-26) was used for statistical analysis [24]. Linear mixed-  
170 effects models were used to examine the effect of disease status on microglial burdens and  
171 CD68-Synapsin I co-localisation. This test was chosen because it allows all 20 images taken  
172 per case to be considered while accounting for non-independence, instead of a single mean  
173 value per case, allowing for a more powerful analysis on the results. QQ plots were generated  
174 in R Studio to check the residuals were normally distributed, which is an assumption of the  
175 mixed-effects model. To meet the assumptions of the test, all datasets were Tukey  
176 transformed prior to analysis (untransformed data presented in graphs). GraphPad Prism 8  
177 was used for generating bar graphs with a mean value plotted per case, represented as a dot.  
178 We considered  $p \leq 0.05$  as significant.

179

180

181

182

183

184

185

186

187

188

189 **Results**

190

191 **Microgliosis**

192

193 We studied post-mortem brains from 10 control (mean age  $64.40 \pm 19.78$ ) and 10 confirmed  
194 schizophrenia cases (mean age  $64.80 \pm 20.37$ ) from dorsolateral pre-frontal cortex (DLPFC,  
195 Brodmann area 46) which is affected in schizophrenia [1]. Gliosis is commonly observed  
196 during loss of brain homeostasis. We examined microglial burden using Iba1 which labels the  
197 microglial cytoplasm and reflect microglial motility and homeostasis Iba1 is considered as a  
198 pan-microglial marker and has been described increased in a subset of neurodegenerative  
199 diseases [25]. The other microglial marker, CD68, labels the lysosomal compartment of  
200 microglia revealing phagocytosis [26] (Figure 1A-B), and is increased in many neurological  
201 diseases, including Alzheimer's disease [27] and stroke [28]. By thresholding for each of the  
202 markers and quantifying their respective burdens, we found there was no difference in either  
203 Iba1 ( $p=0.315$ ) or CD68 ( $p=0.794$ ) burdens between the schizophrenia and control cohorts  
204 (Figure 1) (full statistical outcomes found in Supplementary Table 1). Furthermore, there was  
205 no difference in the co-localisation between CD68 and Iba1 in controls and schizophrenia  
206 brains ( $p=0.639$ ), suggesting the co-expression of the two markers per single cell is  
207 unchanged (Figure 1E).

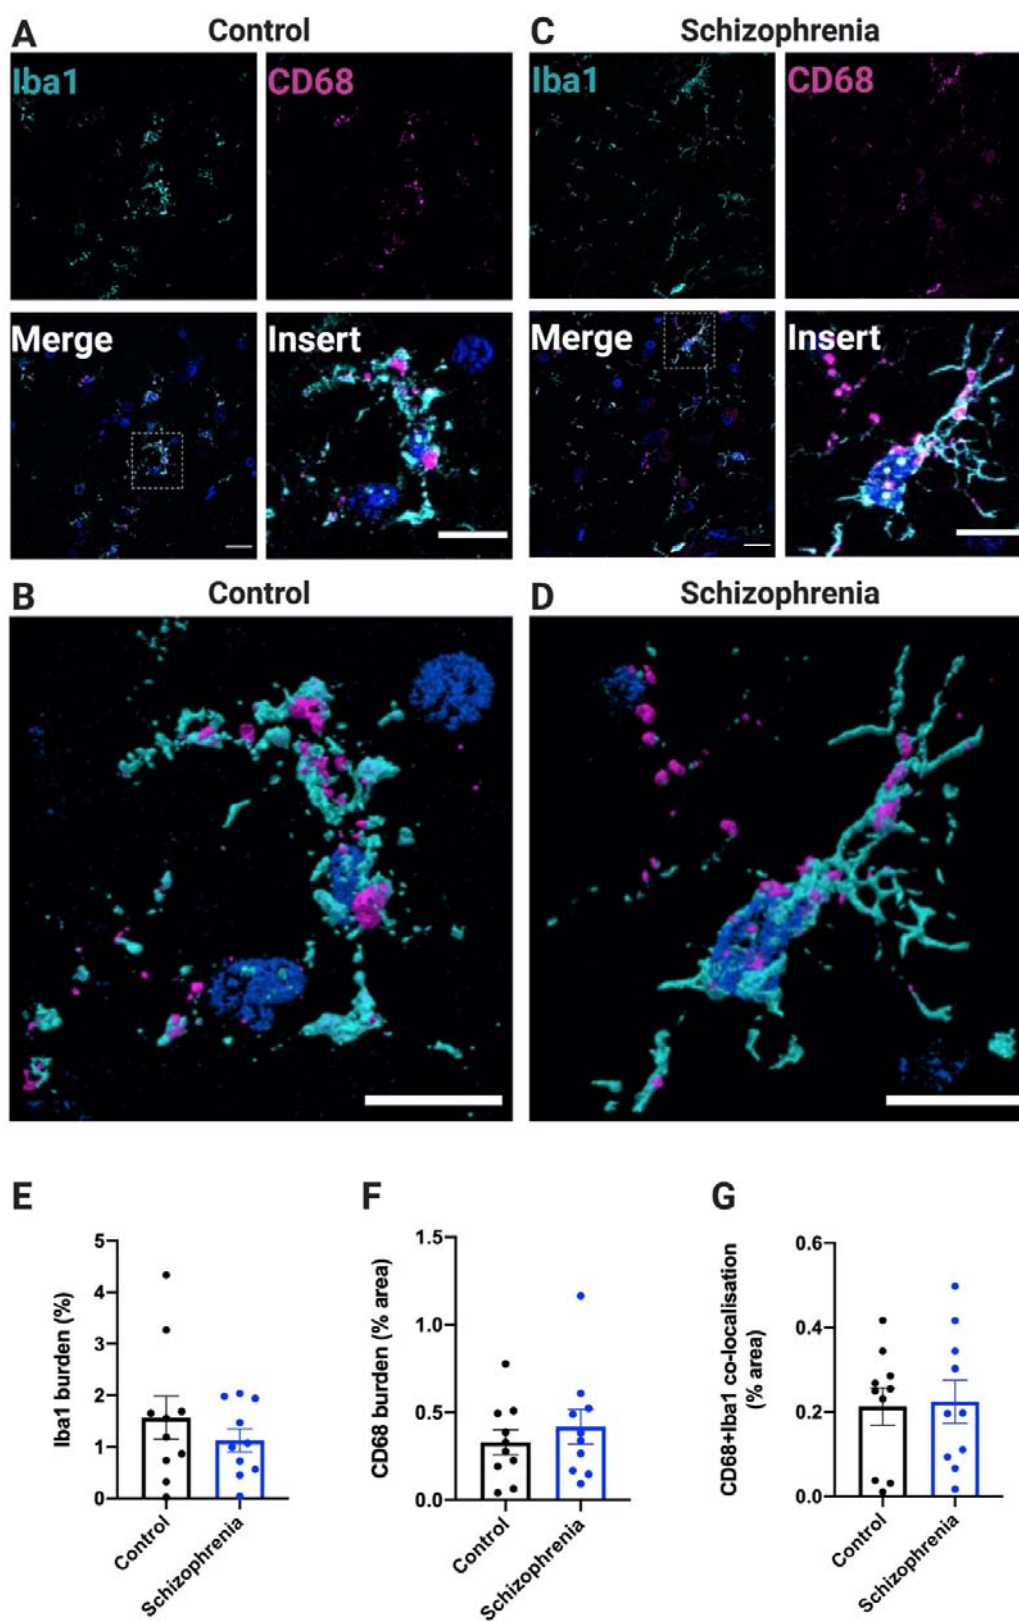



209 **Figure 1. Microgliosis burdens unchanged in control and schizophrenia tissue.**

210 Representative confocal images of immunohistochemistry stained sections for the microglial  
211 markers Iba1 (cyan) and CD68 (magenta) in control (A and B) and schizophrenia (C and D)  
212 tissue. Nuclei are counterstained with DAPI. Scale bars in large images represent 20 $\mu$ m and  
213 10 $\mu$ m in the expanded inserts (denoted by dotted white lines). The insert images of A and B  
214 are represented as 3D-reconstruction in B and D, respectively (scale bar, 10 $\mu$ m). 3-D  
215 reconstructions made on ParaView. Quantification of Iba1 burdens (% area), CD68 burdens  
216 (% area) and Iba1+CD68 co-expression (% area) are shown in panels E, F, and G,  
217 respectively. Each data point represents a mean of 20 images taken per case, where n=10 per  
218 group. Linear mixed-effects model showed no difference in microgliosis between the control  
219 and schizophrenia cases in the above comparisons at a significance threshold of  $p \leq 0.05$ .

220

221

222

223 **Synaptic engulfment**

224

225 Though no difference in microglial burdens between the two cohorts was observed, we aimed  
226 to assess whether microglia were involved in synaptic engulfment in schizophrenia. To do  
227 this, we quantified the amount of co-localisation between synapsin I and CD68 (% area), as a  
228 measure of engulfed synaptic material in the microglial phago-lysosomal compartment  
229 (Figure 2). We found no difference in synaptic engulfment by microglia between the  
230 schizophrenia and control cases ( $p=0.413$ ) (Figure 2). Furthermore, when we normalised this  
231 co-localisation to their respective CD68 or Iba1 burdens, there was still no statistical  
232 difference between schizophrenia and control tissue ( $p=0.167$  and  $p=0.964$  respectively)  
233 (Figure 2). Our data therefore suggest that at the time of death, microglia do not appear to be  
234 involved in aberrant synaptic internalisation in patients with schizophrenia.

235

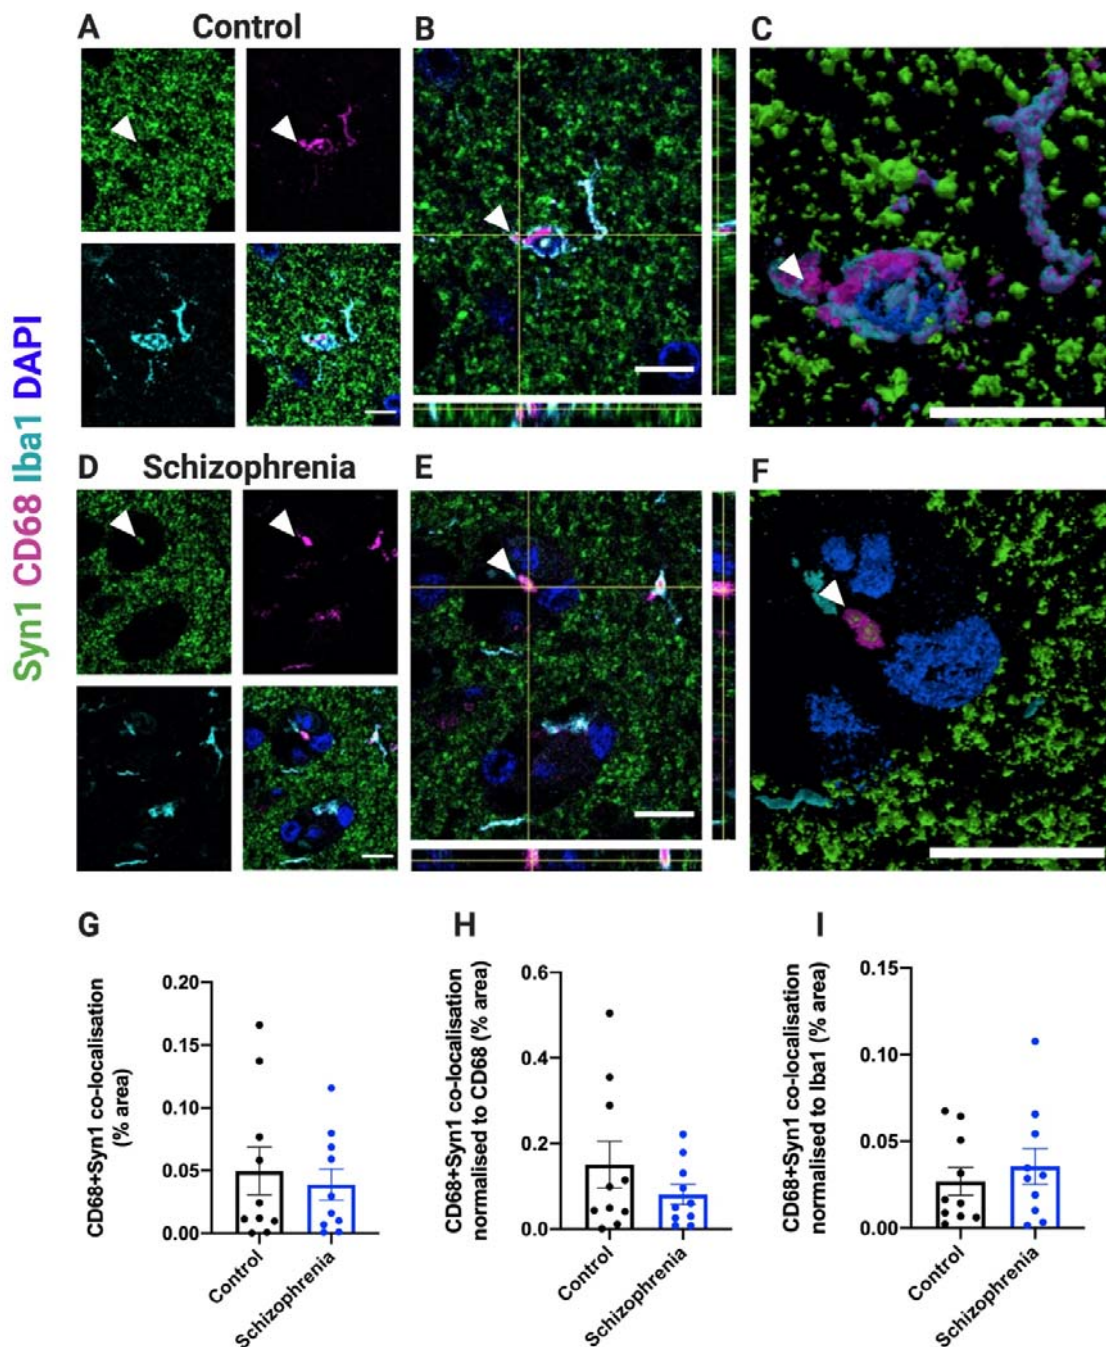

236

237 **Figure 2. No difference found in synaptic engulfment by microglia in post-mortem**  
 238 **tissue.** Representative confocal images of the pre-synaptic marker synapsin I (green), CD68  
 239 (magenta) and Iba1 (cyan) in control (A-C) and schizophrenia tissue (D-F). Nuclei are  
 240 counterstained with DAPI. A and D show individual panels of each stain and lastly the  
 241 merged image, with white arrowheads pointing to sites of co-localisation between CD68 and  
 242 synapsin I. B and E are expanded images of A and D, with orthogonal views indicating where  
 243 CD68 and synapsin I co-localise. C and F represent 3D reconstructions from A and D,  
 244 generated on ParaView. In G, the co-localisation index of CD68 and synapsin I is quantified  
 245 for control and schizophrenia cases, where similar levels of synaptic engulfment by microglia

246 are observed. By normalising each image to their respective CD68 burden or Iba1 burden  
247 there is still no statistical change in the engulfment of synapsin I by CD68. Each data point  
248 represents a mean average of 20 images taken per case, where n=10 per group. Linear mixed-  
249 effects model assessed statistical significance, considering  $p \leq 0.05$  for significance. All scale  
250 bars represent  $10 \mu\text{m}$ .

251

252

## 253 **Discussion**

254

255 In human post-mortem tissue from both patients with schizophrenia and age-matched  
256 controls, we found pre-synaptic proteins inside microglial cells in the frontal cortex of the  
257 brain, but no difference in the levels of synaptic internalisation between the two groups.

258

259 A limitation of our post-mortem tissue is that it provides a snapshot of the disease, which  
260 lacks mechanistic insight. A greater sample size in an independent cohort will be useful to  
261 assess the reproducibility of these results and to stratify by confounding variables like sex  
262 and age. This would also allow assessment of comorbid symptoms in schizophrenia, like  
263 depression or psychosis, and if such symptoms affect microglial and synaptic internalisation  
264 by the cells. However, this study is unique, as schizophrenia tissue is scarce and by the type  
265 of assessment performed.

266

267 With gliosis being reported in multiple brain disorders, we assessed microgliosis in  
268 schizophrenia. As described above, we found no differences in microglial burdens between  
269 disease and control groups. This suggests that microglial activation is not a sustained event in  
270 chronic schizophrenia, and if any changes do occur in these cells it would instead likely  
271 involve functional alterations. Previous literature looking at CD68 expression in control and  
272 schizophrenia cases has also reported a similar outcome [29]. Given that schizophrenia is not  
273 a progressive, albeit chronic disease, it is understandable that if any changes in glial  
274 dynamics were to occur, they may be seen closer to disease onset, and that by the time the  
275 brains were donated 35 years later, any changes would have subsided. This would be  
276 consistent with the observations published to visualise and quantify microglial activation *in*  
277 *vivo* with positron emission computed tomography (PET) using specific ligands of the  
278 translocator protein TSPO [30]. The PET studies have revealed that activated microglia are  
279 present in patients within the first 5 years of disease onset or during a psychotic state,

280 whereas other PET studies in chronic schizophrenia have shown no difference in microglial  
281 activation between healthy controls and these patients.

282 Although developmental synaptic alterations, like synapse loss, have been characterised in  
283 individuals with schizophrenia [3,8], there are key unanswered questions that remain. For  
284 instance, it is not clear how the synapse elimination is mediated, the extent to which it drives  
285 behavioural symptoms, or whether it is the outcome of other disease-specific pathologies. In  
286 neurodegenerative diseases, such as Alzheimer's disease (AD), synapse loss is a hallmark of  
287 the disease [31,32], and it has gained significant attention as it associates strongly with the  
288 cognitive decline seen in patients [33,34]. Although schizophrenia and AD have very  
289 different pathological features and the onset of the two disease is far apart, there are some  
290 common qualities that may help with understanding disease mechanisms. For example, a  
291 prominent mechanism for synaptic elimination in development is the use of the classical  
292 complement cascade (CCC), where it has been shown to sculpt neural circuits by tagging less  
293 electrically active synapses [18,20]. Recent research has now implicated complement as a  
294 signal for aberrant synapse elimination in disease [14,35]. Specifically, variants of C4 of the  
295 CCC are associated with a greater risk of developing schizophrenia [36], as well as poorer  
296 brain connectivity and schizophrenia-like behavioural deficits in mice [37].

297

298 Currently, a suggested mechanism by which complement-tagged synapses are cleared is by  
299 microglial recruitment for synaptic removal. The microglial importance in guiding cerebral  
300 circuitry has been recently described in a case study of a baby born with a homozygous  
301 mutation in the *CSF1R* gene causing a total lack of microglial cells, resulting in early death  
302 [38]. Upon autopsy, ectopic grey matter was found growing in the ventricles and impaired  
303 cell layer separation was observed in the grey matter, suggesting a faulty brain wiring due to  
304 loss of microglia. However, microglia can also be involved in abnormal synaptic elimination.  
305 Indeed, increased microglial-mediated synaptic clearance has been observed in AD mouse  
306 models [39] which was rescued in complement-deficient mice [21,40]. Of note, we have  
307 recently shown in human post-mortem tissue that in AD there is increased synaptic ingestion  
308 by microglia, and that this is exacerbated in areas near amyloid- $\beta$  pathology [41]. In co-  
309 cultured neuron and microglia-like cells from human induced pluripotent stem cells from  
310 control and schizophrenia lines, increased levels of the excitatory post-synaptic protein PSD-  
311 95 was reported phagocytosed in the schizophrenia co-cultures [23]. Interestingly, this  
312 increased phagocytic activity was mainly driven by the presence of schizophrenia-derived  
313 microglia. Indeed, when schizophrenia neurons were co-cultured with microglia from control

314 patients, the phagocytic index was reduced, indicating that in schizophrenia microglia have  
315 intrinsic differences in their phagocytic response. It is worth noting that induced stem cells  
316 are a good model for understanding human disease but represent a developmentally earlier  
317 phenotype, and not that of the age of the donor. Therefore, this supports a role for phagocytic  
318 microglia in early stages of the illness, and may explain why we did not see any changes in  
319 phagocytic ability of microglia towards synapses in chronic schizophrenia, since we are not  
320 studying the developmental time-frame.

321

322 In conclusion, here we report that microglia in human post-mortem tissue internalise pre-  
323 synaptic proteins physiologically, and that this does not appear to be altered in the chronic  
324 form of schizophrenia, at the difference to our observation in AD. Nevertheless, given the  
325 typically early onset of schizophrenia and that synapse loss is likely to have occurred years  
326 before brain collection, we cannot make assumptions on the role of microglia in synaptic  
327 clearance at the start of the disease. Looking forward, it would be interesting to study  
328 difference between young versus older cases in terms of synaptic uptake by microglia, and  
329 phenotype these changes in several brain areas to investigate any region-specific differences.  
330 Lastly, longitudinal PET imaging of the pre-synaptic marker SV2A [42–44] and TSPO  
331 microglial marker would enable exploration of any microglia-synapse association during the  
332 course of the illnesses.

333

## 334 Acknowledgements

335 We would also like to thank our funders, specifically the UK Dementia Research Institute  
336 which receives funding from Alzheimer's Research UK, the Alzheimer's Society, and the  
337 Medical Research Council. We also would like to thank the Wellcome Trust for funding AJS  
338 and TLSJ. Tissue samples were obtained from The Corsellis Collection as part of the UK  
339 Brain Archive Information Network (BRAIN UK) which is funded by the Medical Research  
340 Council and Brain Tumour Research.

341 Authors contributed in the following ways: MT contributed in study design, performed  
342 experiments and imaging, statistical analysis, and manuscript preparation; AJS contributed in  
343 statistical analysis and manuscript editing; DB contributed by providing cut paraffin-  
344 embedded section, study design, and manuscript editing; TLSJ contributed with study design,  
345 statistical analysis, and manuscript editing. Figures created with BioRender.

346

347

## 348 References

349

- 350 1 Kikinis Z, Fallon JH, Niznikiewicz M, Nestor P, Davidson C, Bobrow L, *et al.* Gray  
351 matter volume reduction in rostral middle frontal gyrus in patients with chronic  
352 schizophrenia. *Schizophr Res* 2010;**123**:153–9.
- 353 2 Kahn RS, Sommer IE, Murray RM, Meyer-Lindenberg A, Weinberger DR, Cannon TD,  
354 *et al.* Schizophrenia. *Nat Rev Dis Primers* 2015;**1**:15067.
- 355 3 Feinberg I. Schizophrenia: caused by a fault in programmed synaptic elimination during  
356 adolescence? *J Psychiatr Res* 1982;**17**:319–34.
- 357 4 Faludi G, Mirnics K. Synaptic changes in the brain of subjects with schizophrenia. *Int J*  
358 *Dev Neurosci* 2011;**29**:305–9.
- 359 5 Onwordi EC, Halff EF, Whitehurst T, Mansur A, Cotel M-C, Wells L, *et al.* Synaptic  
360 density marker SV2A is reduced in schizophrenia patients and unaffected by  
361 antipsychotics in rats. *Nat Commun* 2020;**11**:246.
- 362 6 Browning MD, Dudek EM, Rapier JL, Leonard S, Freedman R. Significant reductions in  
363 synapsin but not synaptophysin specific activity in the brains of some schizophrenics.  
364 *Biol Psychiatry* 1993;**34**:529–35.
- 365 7 Funk AJ, Mielnik CA, Koene R, Newburn E, Ramsey AJ, Lipska BK, *et al.* Postsynaptic  
366 Density-95 Isoform Abnormalities in Schizophrenia. *Schizophr Bull* 2017;**43**:891–9.
- 367 8 Osimo EF, Beck K, Reis Marques T, Howes OD. Synaptic loss in schizophrenia: a meta-  
368 analysis and systematic review of synaptic protein and mRNA measures. *Mol Psychiatry*  
369 2019;**24**:549–61.
- 370 9 Wiesel TN, Hubel DH. Effects of visual deprivation on morphology and physiology of  
371 cells in the cats lateral geniculate body. *J Neurophysiol* 1963;**26**:978–93.
- 372 10 Engert F, Bonhoeffer T. Dendritic spine changes associated with hippocampal long-term  
373 synaptic plasticity. *Nature* 1999;**399**:66–70.
- 374 11 Matsuzaki M, Ellis-Davies GC, Nemoto T, Miyashita Y, Iino M, Kasai H. Dendritic  
375 spine geometry is critical for AMPA receptor expression in hippocampal CA1 pyramidal

- 376 neurons. *Nat Neurosci* 2001;**4**:1086–92.
- 377 12 Klauser P, Baker ST, Cropley VL, Bousman C, Fornito A, Cocchi L, *et al.* White matter  
378 disruptions in schizophrenia are spatially widespread and topologically converge on  
379 brain network hubs. *Schizophr Bull* 2017;**43**:425–35.
- 380 13 Eroglu C, Barres BA. Regulation of synaptic connectivity by glia. *Nature* 2010;**468**:223–  
381 31.
- 382 14 Henstridge CM, Tzioras M, Paolicelli RC. Glial contribution to excitatory and inhibitory  
383 synapse loss in neurodegeneration. *Front Cell Neurosci* 2019;**13**:63.
- 384 15 Prinz M, Priller J. Microglia and brain macrophages in the molecular age: from origin to  
385 neuropsychiatric disease. *Nat Rev Neurosci* 2014;**15**:300–12.
- 386 16 Sierra A, Abiega O, Shahraz A, Neumann H. Janus-faced microglia: beneficial and  
387 detrimental consequences of microglial phagocytosis. *Front Cell Neurosci* 2013;**7**:6.
- 388 17 Paolicelli RC, Bolasco G, Pagani F, Maggi L, Scianni M, Panzanelli P, *et al.* Synaptic  
389 pruning by microglia is necessary for normal brain development. *Science*  
390 2011;**333**:1456–8.
- 391 18 Schafer DP, Lehrman EK, Kautzman AG, Koyama R, Mardinly AR, Yamasaki R, *et al.*  
392 Microglia sculpt postnatal neural circuits in an activity and complement-dependent  
393 manner. *Neuron* 2012;**74**:691–705.
- 394 19 Filipello F, Morini R, Corradini I, Zerbi V, Canzi A, Michalski B, *et al.* The microglial  
395 innate immune receptor TREM2 is required for synapse elimination and normal brain  
396 connectivity. *Immunity* 2018;**48**:979–991.e8.
- 397 20 Stevens B, Allen NJ, Vazquez LE, Howell GR, Christopherson KS, Nouri N, *et al.* The  
398 classical complement cascade mediates CNS synapse elimination. *Cell* 2007;**131**:1164–  
399 78.
- 400 21 Hong S, Beja-Glasser VF, Nfonoyim BM, Frouin A, Li S, Ramakrishnan S, *et al.*  
401 Complement and microglia mediate early synapse loss in Alzheimer mouse models.  
402 *Science* 2016;**352**:712–6.
- 403 22 Rajendran L, Paolicelli RC. Microglia-Mediated Synapse Loss in Alzheimer’s Disease. *J*  
404 *Neurosci* 2018;**38**:2911–9.
- 405 23 Sellgren CM, Gracias J, Watmuff B, Biag JD, Thanos JM, Whittredge PB, *et al.*  
406 Increased synapse elimination by microglia in schizophrenia patient-derived models of  
407 synaptic pruning. *Nat Neurosci* 2019;**22**:374–85.
- 408 24 Team RC. R: A language and environment for statistical computing. R Foundation for  
409 Statistical Computing, Vienna, Austria. 2012. URL <http://www.R>
- 410 25 Boche D, Perry VH, Nicoll JAR. Review: activation patterns of microglia and their  
411 identification in the human brain. *Neuropathol Appl Neurobiol* 2013;**39**:3–18.
- 412 26 Franco-Bocanegra DK, McAuley C, Nicoll JAR, Boche D. Molecular mechanisms of  
413 microglial motility: changes in ageing and alzheimer’s disease. *Cells* 2019;**8**.  
414 doi:10.3390/cells8060639
- 415 27 Minett T, Classey J, Matthews FE, Fahrenhold M, Taga M, Brayne C, *et al.* Microglial  
416 immunophenotype in dementia with Alzheimer’s pathology. *J Neuroinflammation*  
417 2016;**13**:135.
- 418 28 Shen F, Jiang L, Han F, Degos V, Chen S, Su H. Increased Inflammatory Response in  
419 Old Mice is Associated with More Severe Neuronal Injury at the Acute Stage of  
420 Ischemic Stroke. *Aging Dis* 2019;**10**:12–22.
- 421 29 Arnold SE, Trojanowski JQ, Gur RE, Blackwell P, Han LY, Choi C. Absence of  
422 neurodegeneration and neural injury in the cerebral cortex in a sample of elderly patients  
423 with schizophrenia. *Arch Gen Psychiatry* 1998;**55**:225–32.
- 424 30 De Picker LJ, Morrens M, Chance SA, Boche D. Microglia and Brain Plasticity in Acute  
425 Psychosis and Schizophrenia Illness Course: A Meta-Review. *Front Psychiatry*

- 426 2017;**8**:238.
- 427 31 Koffie RM, Meyer-Luehmann M, Hashimoto T, Adams KW, Mielke ML, Garcia-Alloza  
428 M, *et al.* Oligomeric amyloid beta associates with postsynaptic densities and correlates  
429 with excitatory synapse loss near senile plaques. *Proc Natl Acad Sci USA*  
430 2009;**106**:4012–7.
- 431 32 Spires-Jones TL, Hyman BT. The intersection of amyloid beta and tau at synapses in  
432 Alzheimer’s disease. *Neuron* 2014;**82**:756–71.
- 433 33 DeKosky ST, Scheff SW. Synapse loss in frontal cortex biopsies in Alzheimer’s disease:  
434 correlation with cognitive severity. *Ann Neurol* 1990;**27**:457–64.
- 435 34 Terry RD, Masliah E, Salmon DP, Butters N, DeTeresa R, Hill R, *et al.* Physical basis of  
436 cognitive alterations in Alzheimer’s disease: synapse loss is the major correlate of  
437 cognitive impairment. *Ann Neurol* 1991;**30**:572–80.
- 438 35 Carpanini SM, Torvell M, Morgan BP. Therapeutic inhibition of the complement system  
439 in diseases of the central nervous system. *Front Immunol* 2019;**10**:362.
- 440 36 Sekar A, Bialas AR, de Rivera H, Davis A, Hammond TR, Kamitaki N, *et al.*  
441 Schizophrenia risk from complex variation of complement component 4. *Nature*  
442 2016;**530**:177–83.
- 443 37 Comer AL, Jinadasa T, Sriram B, Phadke RA, Kretsge LN, Nguyen TPH, *et al.*  
444 Increased expression of schizophrenia-associated gene C4 leads to hypoconnectivity of  
445 prefrontal cortex and reduced social interaction. *PLoS Biol* 2020;**18**:e3000604.
- 446 38 Oosterhof N, Chang IJ, Karimiani EG, Kuil LE, Jensen DM, Daza R, *et al.* Homozygous  
447 Mutations in CSF1R Cause a Pediatric-Onset Leukoencephalopathy and Can Result in  
448 Congenital Absence of Microglia. *Am J Hum Genet* 2019;**104**:936–47.
- 449 39 Dejanovic B, Huntley MA, De Mazière A, Meilandt WJ, Wu T, Srinivasan K, *et al.*  
450 Changes in the Synaptic Proteome in Tauopathy and Rescue of Tau-Induced Synapse  
451 Loss by C1q Antibodies. *Neuron* 2018;**100**:1322–1336.e7.
- 452 40 Shi Q, Chowdhury S, Ma R, Le KX, Hong S, Caldarone BJ, *et al.* Complement C3  
453 deficiency protects against neurodegeneration in aged plaque-rich APP/PS1 mice. *Sci*  
454 *Transl Med* 2017;**9**. doi:10.1126/scitranslmed.aaf6295
- 455 41 Tzioras M, Daniels MJ, King D, Popovic K, Holloway RK, Stevenson AJ, *et al.* Altered  
456 synaptic ingestion by human microglia in Alzheimer’s disease. *BioRxiv* Published Online  
457 First: 7 October 2019. doi:10.1101/795930
- 458 42 Li S, Cai Z, Wu X, Holden D, Pracitto R, Kapinos M, *et al.* Synthesis and in vivo  
459 evaluation of a novel PET radiotracer for imaging of synaptic vesicle glycoprotein 2A  
460 (SV2A) in nonhuman primates. *ACS Chem Neurosci* 2019;**10**:1544–54.
- 461 43 Chen M-K, Mecca AP, Naganawa M, Finnema SJ, Toyonaga T, Lin S-F, *et al.* Assessing  
462 synaptic density in alzheimer disease with synaptic vesicle glycoprotein 2A positron  
463 emission tomographic imaging. *JAMA Neurol* 2018;**75**:1215–24.
- 464 44 Colom-Cadena M, Spires-Jones T, Zetterberg H, Blennow K, Caggiano A, DeKosky ST,  
465 *et al.* The clinical promise of biomarkers of synapse damage or loss in Alzheimer’s  
466 disease. *Alzheimers Res Ther* 2020;**12**:21.

467

468

469

470

471

472

473



474 **Supplementary Table 1:** Linear mixed-effects model outcomes from R Studio.

475

| <b>Measurement</b>                      | <b>Effect size</b> | <b>Standard Error</b> | <b>p-value</b> |
|-----------------------------------------|--------------------|-----------------------|----------------|
| Iba1 burden (% area)                    | -0.1637            | 0.1580                | 0.315          |
| CD68 burden (% area)                    | 0.0165             | 0.06215               | 0.794          |
| CD68+Iba1 colocalisation (% area)       | -0.0378            | 0.0792                | 0.639          |
| CD68+Syn1 colocalisation (% area)       | -0.0772            | 0.0917                | 0.413          |
| CD68+Syn1 colocalisation /CD68 (% area) | -0.1414            | 0.0980                | 0.167          |
| CD68+Syn1 colocalisation /Iba1 (% area) | -0.0044            | 0.0958                | 0.964          |

476
